# Supplementary material for: Outcomes to evaluate care for adults with acute dental pain and infection: a systematic narrative review
Source: HighWire-hosted journal article supplement (doi:10.1136/bmjopen-2021-057934), 2022-02-01
Supplement: bmjopen-2021-057934supp001_data_supplement.pdf [file bmjopen-2021-057934supp001_data_supplement.pdf]

## Supplemental Material

### Table S1 – Inclusion/Exclusion Criteria

#### Inclusion criteria:

- Population:
  - Adults presenting with acute dental pain and/or infection
  - Any healthcare setting or service (not limited to dentistry)
- Intervention
  - Any care provided for the relief of acute dental pain or treatment of acute dental infection, including operative and pharmacological treatment and other non-pharmacological approaches (including advice only or referral to other services).
- Outcome
  - All outcomes measured and reported by the study which are related to the relief of acute dental pain or treatment of acute dental infection.
- Study/publication type
  - Primary research reported in peer reviewed journals
  - English language only

#### Exclusion criteria:

- Population
  - Animal studies
  - In-vitro / lab-based studies
  - People under the age of 18 years
  - People with other oral or dental conditions (eg emergency dental conditions such as cervico-facial infections requiring hospitalisation, dental trauma or haemorrhage following an extraction; oral cancer; or chronic conditions such as chronic facial pain, TMD or trigeminal neuralgia)
  - People attending for routine preventative care
  - People attending for postoperative pain following routine/scheduled dental care eg removal of third molars
  - People with unusual medical conditions eg glucose-6-dehydrogenase deficiency
  - Papers which include both adults and children
  - Papers which include non-acute as well as acute conditions
  - Paper which included non-dental as well as dental conditions
- Intervention
  - Approaches outside of conventional guidelines eg holistic or complementary therapies including acupuncture
- Outcomes
  - Outcomes which are not related to the relief of acute dental pain or treatment of acute dental infection.
  - Outcomes relating to local anaesthesia to enable treatment
- Study/publication type:
  - Systematic review
  - Guidelines and guideline development
  - Trial Protocol
  - Opinion piece/Commentary/Review articles/Case Reports/Letters
  - Qualitative studies
  - Studies if updates had subsequently been published
  - Manuscript not in English (e.g. abstract in English but not the rest)
  - No abstract available – or only an abstract available

Table S2 – Search terms for each database

| Database                                               | Population search terms                                                                                                                                                                                                                                          | Boolean Operator | Intervention search terms                                                                                                                                                                                                                                                                                                                                                                                                                               | Limitations employed                  |
|--------------------------------------------------------|------------------------------------------------------------------------------------------------------------------------------------------------------------------------------------------------------------------------------------------------------------------|------------------|---------------------------------------------------------------------------------------------------------------------------------------------------------------------------------------------------------------------------------------------------------------------------------------------------------------------------------------------------------------------------------------------------------------------------------------------------------|---------------------------------------|
| <b>CINAHL Plus (EBSCO Host)</b>                        | ((Acute* or Urgent or Unschedul* or Emergenc*) AND (Dent* or Odontogenic or Dentoalveolar) AND (Pain or Toothache or Pulpitis or Infection or Swell* or Abscess or Pericoronitis or Osteitis or Socket or Periodontitis or Implantitis or Ulcer* or Stomatitis)) | AND              | (Procedure or Treat* or Endodont* or Exodont* or Extract* or Extirpat* or Incis* or Drain* or Debrid* or Irrigat* or Prescri* or Antibiotic* or Antimicrob* or Antiseptic or Analgesi* or Advice or Refer* or Patient Care or Dental Care or Procedure or Treat* or Endodont* or Exodont* or Extract* or Extirpat* or Incis* or Drain* or Debrid* or Irrigat* or Prescri* or Antibiotic* or Antimicrob* or Antiseptic or Analgesi* or Advice or Refer*) | English Language<br>Academic Journals |
| <b>Dentistry and Oral Science Sources (EBSCO Host)</b> | ((Acute* or Urgent or Unschedul* or Emergenc*) AND (Dent* or Odontogenic or Dentoalveolar) AND (Pain or Toothache or Pulpitis or Infection or Swell* or Abscess or Pericoronitis or Osteitis or Socket or Periodontitis or Implantitis or Ulcer* or Stomatitis)) | AND              | (Procedure or Treat* or Endodont* or Exodont* or Extract* or Extirpat* or Incis* or Drain* or Debrid* or Irrigat* or Prescri* or Antibiotic* or Antimicrob* or Antiseptic or Analgesi* or Advice or Refer* or Patient Care or Dental Care or Procedure or Treat* or Endodont* or Exodont* or Extract* or Extirpat* or Incis* or Drain* or Debrid* or Irrigat* or Prescri* or Antibiotic* or Antimicrob* or Antiseptic or Analgesi* or Advice or Refer*) | English Language<br>Academic Journals |
| <b>EMBASE (Ovid Online)</b>                            | ((Acute* or Urgent or Unschedul* or Emergenc*) AND (Dent* or Odontogenic or Dentoalveolar) AND (Pain or Toothache or Pulpitis or Infection or Swell* or Abscess or Pericoronitis or Osteitis or Socket or Periodontitis or                                       | AND              | (Procedure or Treat* or Endodont* or Exodont* or Extract* or Extirpat* or Incis* or Drain* or Debrid* or Irrigat* or Prescri* or Antibiotic* or Antimicrob* or Antiseptic or Analgesi* or Advice or Refer* or Patient Care or Dental Care or Procedure or Treat* or Endodont* or Exodont* or Extract* or Extirpat* or Incis* or Drain* or Debrid* or Irrigat* or Prescri* or Antibiotic* or                                                             | English Language<br>Human             |

|                                |                                                                                                                                                                                                                                                                                  |     |                                                                                                                                                                                                                                                                                                                                                                                                                                                            |                                                 |
|--------------------------------|----------------------------------------------------------------------------------------------------------------------------------------------------------------------------------------------------------------------------------------------------------------------------------|-----|------------------------------------------------------------------------------------------------------------------------------------------------------------------------------------------------------------------------------------------------------------------------------------------------------------------------------------------------------------------------------------------------------------------------------------------------------------|-------------------------------------------------|
|                                | Implantitis or Ulcer* or Stomatitis)).mp                                                                                                                                                                                                                                         |     | Antimicrob* or Antiseptic or Analgesi* or Advice or Refer*).mp                                                                                                                                                                                                                                                                                                                                                                                             |                                                 |
| <b>Medline (Ovid Online)</b>   | ((Acute* or Urgent or Unschedul* or Emergenc*) AND (Dent* or Odontogenic or Dentoalveolar) AND (Pain or Toothache or Pulpitis or Infection or Swell* or Abscess or Pericoronitis or Osteitis or Socket or Periodontitis or Implantitis or Ulcer* or Stomatitis)).mp              | AND | (Procedure or Treat* or Endodont* or Exodont* or Extract* or Extirpat* or Incis* or Drain* or Debrid* or Irrigat* or Prescri* or Antibiotic* or Antimicrob* or Antiseptic or Analgesi* or Advice or Refer* or Patient Care or Dental Care or Procedure or Treat* or Endodont* or Exodont* or Extract* or Extirpat* or Incis* or Drain* or Debrid* or Irrigat* or Prescri* or Antibiotic* or Antimicrob* or Antiseptic or Analgesi* or Advice or Refer*).mp | English Language<br>Human                       |
| <b>PsychINFO (Ovid Online)</b> | ((Acute* or Urgent or Unschedul* or Emergenc*) AND (Dent* or Odontogenic or Dentoalveolar) AND (Pain or Toothache or Pulpitis or Infection or Swell* or Abscess or Pericoronitis or Osteitis or Socket or Periodontitis or Implantitis or Ulcer* or Stomatitis)).mp              | AND | (Procedure or Treat* or Endodont* or Exodont* or Extract* or Extirpat* or Incis* or Drain* or Debrid* or Irrigat* or Prescri* or Antibiotic* or Antimicrob* or Antiseptic or Analgesi* or Advice or Refer* or Patient Care or Dental Care or Procedure or Treat* or Endodont* or Exodont* or Extract* or Extirpat* or Incis* or Drain* or Debrid* or Irrigat* or Prescri* or Antibiotic* or Antimicrob* or Antiseptic or Analgesi* or Advice or Refer*).mp | English Language<br>Human                       |
| <b>Scopus</b>                  | Search within article title, abstract, key words:<br>'((Acute* or Urgent or Unschedul* or Emergenc*) AND (Dent* or Odontogenic or Dentoalveolar) AND (Pain or Toothache or Pulpitis or Infection or Swell* or Abscess or Pericoronitis or Osteitis or Socket or Periodontitis or | AND | (Procedure or Treat* or Endodont* or Exodont* or Extract* or Extirpat* or Incis* or Drain* or Debrid* or Irrigat* or Prescri* or Antibiotic* or Antimicrob* or Antiseptic or Analgesi* or Advice or Refer* or Patient Care or Dental Care or Procedure or Treat* or Endodont* or Exodont* or Extract* or Extirpat* or Incis* or Drain* or Debrid* or Irrigat* or Prescri* or Antibiotic* or Antimicrob* or Antiseptic or Analgesi* or Advice or Refer*)    | Published Articles<br>English Language<br>Human |

|                       |                                                                                                                                                                                                                                                                  |     |                                                                                                                                                                                                                                                                                                                                                                                                                                                         |                              |
|-----------------------|------------------------------------------------------------------------------------------------------------------------------------------------------------------------------------------------------------------------------------------------------------------|-----|---------------------------------------------------------------------------------------------------------------------------------------------------------------------------------------------------------------------------------------------------------------------------------------------------------------------------------------------------------------------------------------------------------------------------------------------------------|------------------------------|
|                       | Implantitis or Ulcer* or Stomatitis))'                                                                                                                                                                                                                           |     |                                                                                                                                                                                                                                                                                                                                                                                                                                                         |                              |
| <b>Web of Science</b> | ((Acute* or Urgent or Unschedul* or Emergenc*) AND (Dent* or Odontogenic or Dentoalveolar) AND (Pain or Toothache or Pulpitis or Infection or Swell* or Abscess or Pericoronitis or Osteitis or Socket or Periodontitis or Implantitis or Ulcer* or Stomatitis)) | AND | (Procedure or Treat* or Endodont* or Exodont* or Extract* or Extirpat* or Incis* or Drain* or Debrid* or Irrigat* or Prescri* or Antibiotic* or Antimicrob* or Antiseptic or Analgesi* or Advice or Refer* or Patient Care or Dental Care or Procedure or Treat* or Endodont* or Exodont* or Extract* or Extirpat* or Incis* or Drain* or Debrid* or Irrigat* or Prescri* or Antibiotic* or Antimicrob* or Antiseptic or Analgesi* or Advice or Refer*) | Articles<br>English Language |

**Table S3 – Quality assessment of the studies using Critical Appraisal Skills Programme (CASP) Checklist for Randomised Controlled Trials**

|                               | a) Is the basic study design valid for an RCT? |                   |                                    | b) Was the study methodologically sound? |                            |                       |                                       | c) What are the results?          |                             | d) Will the results help?   |                        | Overall<br>Include? |                                |
|-------------------------------|------------------------------------------------|-------------------|------------------------------------|------------------------------------------|----------------------------|-----------------------|---------------------------------------|-----------------------------------|-----------------------------|-----------------------------|------------------------|---------------------|--------------------------------|
|                               | 1. Clear research question?                    | 2. Randomisation? | 3. All participants accounted for? | 4a. Participants blinded?                | 4b. Investigators blinded? | 4c. Analysts blinded? | 5. Study groups similar at the start? | 6. Same treatment for each group? | 7. Comprehensive reporting? | 8. Benefits vs harms/costs? | 9. Locally applicable? |                     | 10. Better than existing care? |
| <b>Fazakerley et al, 1993</b> | Yes                                            | Yes               | Yes                                | Yes                                      | Yes                        | Can't tell            | Can't tell                            | Yes                               | Yes                         | Yes                         | Yes                    | Yes                 | Yes                            |
| <b>Fouad et al, 1996</b>      | Yes                                            | Yes               | Yes                                | Yes                                      | Yes                        | Can't tell            | Can't tell                            | Yes                               | Yes                         | Yes                         | Yes                    | Can't tell          | Yes                            |
| <b>Houck et al, 2000</b>      | Yes                                            | Yes               | Yes                                | Yes                                      | Yes                        | Yes                   | Yes                                   | Yes                               | Yes                         | Yes                         | Yes                    | Yes                 | Yes                            |
| <b>Nagle et al, 2000</b>      | Yes                                            | Yes               | Yes                                | Yes                                      | Yes                        | Yes                   | Yes                                   | Yes                               | Yes                         | Yes                         | Yes                    | Yes                 | Yes                            |
| <b>Pavithra et al, 2015</b>   | Yes                                            | Yes               | Yes                                | Yes                                      | Yes                        | No                    | Can't tell                            | Yes                               | No                          | Yes                         | Yes                    | Yes                 | Yes                            |
| <b>Santini et al, 2017</b>    | Yes                                            | Yes               | Yes                                | Yes                                      | Yes                        | Can't tell            | Yes                                   | Yes                               | Can't tell                  | Can't tell                  | No                     | Can't tell          | Yes                            |
| <b>Beus et al, 2018</b>       | Yes                                            | Yes               | Yes                                | Yes                                      | No                         | Can't tell            | Yes                                   | Yes                               | No                          | Yes                         | Yes                    | Can't tell          | Yes                            |
| <b>Eren et al, 2018</b>       | Yes                                            | Yes               | Yes                                | Yes                                      | No                         | No                    | Yes                                   | Yes                               | Yes                         | Yes                         | Yes                    | Yes                 | Yes                            |
| <b>Wolf et al, 2019</b>       | Yes                                            | Yes               | Yes                                | Can't tell                               | No                         | No                    | Yes                                   | Yes                               | Yes                         | Yes                         | Yes                    | Yes                 | Yes                            |
| <b>Al-Rawhani et al, 2020</b> | Yes                                            | Yes               | Yes                                | Yes                                      | Yes                        | Can't tell            | Yes                                   | Yes                               | Yes                         | Yes                         | Yes                    | Yes                 | Yes                            |
| <b>da Silva et al, 2020</b>   | Yes                                            | Yes               | Yes                                | Yes                                      | Yes                        | Can't tell            | Yes                                   | Yes                               | Yes                         | Yes                         | Yes                    | Yes                 | Yes                            |

**Table S3 – Quality assessment of studies which were not randomised controlled trials, using the Quality Assessment Tool for Studies with Diverse Designs (QATSDD)**

|                                                                                                                                                                         | Explicit theoretical framework | Aims in main report | Setting described | Sample size considered | Sample of reasonable size | Data collection method | Choice of data collection tool(s) | Detailed recruitment data | Measuring tool assessed | Question and method fit - data collection | Question and method fit - analysis | Analysis method selected | Users involved in design | Strength/ limitation discussion | Total (% of maximum) |
|-------------------------------------------------------------------------------------------------------------------------------------------------------------------------|--------------------------------|---------------------|-------------------|------------------------|---------------------------|------------------------|-----------------------------------|---------------------------|-------------------------|-------------------------------------------|------------------------------------|--------------------------|--------------------------|---------------------------------|----------------------|
| <b>Scoring:</b> 0 = No mention; 1=very slightly covered; 2=Moderately covered; 3=Completely covered. Where independent reviewer scores differed, averages are provided. |                                |                     |                   |                        |                           |                        |                                   |                           |                         |                                           |                                    |                          |                          |                                 |                      |
| <b>Gibson et al, 1993</b>                                                                                                                                               | 0                              | 2                   | 2                 | 0                      | 3                         | 2                      | 1                                 | 2                         | 0                       | 3                                         | 2                                  | 1                        | 1                        | 2                               | 21 (53%)             |
| <b>Nusstein et al, 2002</b>                                                                                                                                             | 1                              | 3                   | 2                 | 0                      | 0                         | 3                      | 2                                 | 3                         | 1                       | 2                                         | 3                                  | 1                        | 0                        | 1                               | 22 (55%)             |
| <b>Campanelli et al, 2008</b>                                                                                                                                           | 0                              | 2                   | 3                 | 0                      | 1                         | 3                      | 0                                 | 3                         | 1                       | 3                                         | 3                                  | 1                        | 0                        | 1                               | 21 (53%)             |
| <b>Cohen et al, 2009</b>                                                                                                                                                | 3                              | 3                   | 3                 | 1                      | 2                         | 3                      | 3                                 | 3                         | 1                       | 3                                         | 3                                  | 3                        | 3                        | 2                               | 36 (90%)             |
| <b>Wilson et al, 2013</b>                                                                                                                                               | 0                              | 1                   | 3                 | 0                      | 1                         | 1                      | 3                                 | 2                         | 1                       | 2                                         | 2                                  | 1                        | 3                        | 3                               | 23 (58%)             |
| <b>Aaron et al, 2018</b>                                                                                                                                                | 0                              | 3                   | 3                 | 3                      | 3                         | 3                      | 1                                 | 0                         | 0                       | 3                                         | 2                                  | 1                        | 0                        | 2                               | 24 (60%)             |
| <b>Penniston et al, 1996</b>                                                                                                                                            | 0                              | 2                   | 3                 | 3                      | 1                         | 2                      | 0                                 | 2.5                       | 0                       | 3                                         | 3                                  | 1                        | 0                        | 0                               | 20.5 (51%)           |
| <b>Adriaenssen et al, 1998</b>                                                                                                                                          | 2                              | 1                   | 3                 | 3                      | 3                         | 2                      | 1                                 | 2                         | 0                       | 1                                         | 2                                  | 0                        | 0                        | 0                               | 20 (50%)             |
| <b>Doroschak et al, 1999</b>                                                                                                                                            | 3                              | 3                   | 3                 | 2                      | 1                         | 3                      | 3                                 | 2.5                       | 2                       | 3                                         | 3                                  | 1                        | 0                        | 2                               | 31.5 (79%)           |
| <b>Gallatin et al, 2000</b>                                                                                                                                             | 3                              | 3                   | 1                 | 0                      | 1                         | 3                      | 1                                 | 3                         | 0                       | 3                                         | 2                                  | 1                        | 0                        | 1                               | 22 (55%)             |
| <b>Henry et al, 2001</b>                                                                                                                                                | 3                              | 3                   | 1                 | 0                      | 1.5                       | 2.5                    | 0                                 | 3                         | 0                       | 3                                         | 2                                  | 1                        | 0                        | 2                               | 22 (55%)             |
| <b>Hersh et al, 2003</b>                                                                                                                                                | 3                              | 3                   | 3                 | 0                      | 3                         | 2                      | 3                                 | 3                         | 0                       | 3                                         | 3                                  | 2                        | 0                        | 2                               | 30 (75%)             |
| <b>Runyon et al, 2004</b>                                                                                                                                               | 3                              | 3                   | 2                 | 3                      | 3                         | 3                      | 1                                 | 3                         | 0                       | 3                                         | 3                                  | 2                        | 0                        | 3                               | 32 (80%)             |
| <b>Sethi et al, 2014</b>                                                                                                                                                | 1                              | 3                   | 1                 | 2                      | 3                         | 3                      | 3                                 | 3                         | 0                       | 3                                         | 3                                  | 2                        | 0                        | 1                               | 28 (70%)             |
| <b>Bultema et al, 2016</b>                                                                                                                                              | 3                              | 3                   | 1                 | 0                      | 3                         | 2                      | 2                                 | 3                         | 0                       | 3                                         | 3                                  | 1                        | 0                        | 2                               | 26 (65%)             |
| <b>Sebastian et al, 2016</b>                                                                                                                                            | 2                              | 3                   | 1                 | 0                      | 3                         | 2                      | 1                                 | 3                         | 0                       | 2                                         | 2                                  | 1                        | 0                        | 1                               | 21 (53%)             |
| <b>Taggar et al, 2017</b>                                                                                                                                               | 3                              | 3                   | 1                 | 1                      | 3                         | 3                      | 1                                 | 3                         | 0                       | 2                                         | 2                                  | 1                        | 0                        | 3                               | 26 (65%)             |
